# Supplementary material for: Experimental evidence of enhanced water dissociation and spatially dependent charge-transfer reactions in mix-gas inductively coupled plasma optical emission spectrometry
Source: Royal Society of Chemistry journal article supplement (doi:10.1039/c6ja00058d), 2016-01-01
Supplement: c6ja00058d1.pdf [file c6ja00058d1.pdf]

**Experimental evidence of water dissociation and spatial dependent charge-transfer reactions in a mix-gas inductively coupled plasma optical emission spectrometry**

Guilherme Luiz Scheffler, Camila Alves Martins and Dirce Pozebon

*Institute of Chemistry, Federal University of Rio Grande do Sul, Av. Bento Gonçalves, 9500, 91501-970 Porto*

*Alegre, RS, Brazil.*

## Samples and Samples Preparation

The following certified reference materials were analyzed: Pine Needles (NIST 1575a), Bovine Liver (NIST 1577c), and Wheat Flour (NIST 1567a) from National Institute of Standards, and bush branches and leaves (NIM-GBW07602) from IGGE (Institute of Geophysical and Geochemical Exploration, China). 250 mg of sample were weighed and transferred to the vessel accompanying the microwave oven. Subsequently, 3 mL of HNO<sub>3</sub> and 1 mL of H<sub>2</sub>O<sub>2</sub> were added to the sample in the flask. The flask was closed, adjusted in the rotor, and placed inside the microwave oven. The program informed in Table S1 was then run. A microwave oven (Berghof, Speedwave four, Eningen, Germany) was used to assist the samples decomposition. The obtained solution was transferred to graduated vials and the volume adjusted to 25 mL by adding water.

**Table S1** Microwave heating program applied to assist the certified reference material decomposition

| Temperature<br>(°C) | Pressure<br>(bar) | Ramp<br>(min.) | Holding<br>(min.) | Pressure<br>(%) |
|---------------------|-------------------|----------------|-------------------|-----------------|
| 170                 | 38                | 5              | 2                 | 80              |
| 190                 | 38                | 5              | 2                 | 90              |
| 50                  | 38                | 5              | 2                 | 0               |
| 50                  | 0                 | 3              | 15                | 0               |
| 50                  | 0                 | 0              | 0                 | 0               |

**Table S2** Argon spectral lines that were monitored to study spatial dependence of charge transfer reactions in the ICP

| Emission line<br>(nm) | Excitation Energy<br>(eV) | Emission<br>line (nm) | Excitation Energy<br>(eV) | Emission line<br>(nm) | Excitation Energy<br>(eV) |
|-----------------------|---------------------------|-----------------------|---------------------------|-----------------------|---------------------------|
| Ar 549.588            | 15.33                     | Ar 383.470            | 15.06                     | Ar 433.535            | 14.68                     |
| Ar 614.544            | 15.31                     | Ar 355.433            | 15.03                     | Ar 434.518            | 14.68                     |
| Ar 610.564            | 15.31                     | Ar 720.698            | 15.02                     | Ar 433.357            | 14.68                     |
| Ar 573.952            | 15.31                     | Ar 356.768            | 15.02                     | Ar 418.190            | 14.68                     |
| Ar 557.254            | 15.31                     | Ar 660.485            | 14.97                     | Ar 404.443            | 14.68                     |
| Ar 516.229            | 15.30                     | Ar 605.937            | 14.95                     | Ar 394.900            | 14.68                     |
| Ar 629.688            | 15.29                     | Ar 731.172            | 14.84                     | Ar 451.075            | 14.57                     |
| Ar 518.775            | 15.29                     | Ar 743.533            | 14.83                     | Ar 419.834            | 14.57                     |
| Ar 364.986            | 15.22                     | Ar 710.748            | 14.83                     | Ar 426.630            | 14.52                     |
| Ar 588.859            | 15.18                     | Ar 703.025            | 14.83                     | Ar 427.220            | 14.52                     |
| Ar 545.165            | 15.18                     | Ar 641.631            | 14.83                     | Ar 415.861            | 14.52                     |
| Ar 621.250            | 15.16                     | Ar 748.433            | 14.80                     | Ar 416.420            | 14.52                     |
| Ar 604.323            | 15.14                     | Ar 735.328            | 14.78                     | Ar 430.012            | 14.50                     |
| Ar 630.766            | 15.13                     | Ar 737.212            | 14.75                     | Ar 419.073            | 14.50                     |
| Ar 603.213            | 15.13                     | Ar 789.108            | 14.74                     | Ar 420.069            | 14.49                     |
| Ar 555.870            | 15.13                     | Ar 675.283            | 14.74                     | Ar 470.232            | 14.46                     |
| Ar 560.673            | 15.11                     | Ar 425.938            | 14.73                     | Ar 425.120            | 14.46                     |
| Ar 565.070            | 15.10                     | Ar 687.129            | 14.71                     | Ar 667.728            | 13.47                     |
| Ar 383.470            | 15.06                     | Ar 693.767            | 14.69                     | Ar 714.704            | 13.28                     |

**Table S3** Analysis of certified reference materials using pneumatic nebulization/aerosol desolvation - membrane desolvation (PN/DES-MD) for introducing the sample solution into the ICP. Emission signals were measured in Ar-N<sub>2</sub> ICP axially viewed

| Element | GBW07602                 |             | NIST 1575a    |               | NIST 1577c        |               | NIST 1567a    |             |
|---------|--------------------------|-------------|---------------|---------------|-------------------|---------------|---------------|-------------|
|         | (Bush branch and leaves) |             | Pine Needles) |               | (Bovine liver)    |               | (Wheat flour) |             |
|         | Certified                | Found       | Certified     | Found         | Certified         | Found         | Certified     | Found       |
| Pb      | 7.1 ± 1.1                | 7.3 ± 1.9   | 0.167 ± 0.015 | < 0.25        | 0.0628 ± 0.001    | < 0.25        | < 0.020       | < 0.25      |
| Zn      | 20.6 ± 2.2               | 20.7 ± 0.8  | 38 ± 2        | 37 ± 1        | 181.1 ± 1.0       | 170.0 ± 9.0   | 11.6 ± 0.4    | 11.0 ± 0.4  |
| Cd      | 0.14 ± 0.06              | 0.14 ± 0.01 | 0.233 ± 0.004 | 0.240 ± 0.010 | 0.097 ± 0.001     | 0.11 ± 0.01   | 0.026 ± 0.002 | < 0.020     |
| Fe      | 1020 ± 67                | 917 ± 21    | 46 ± 2        | 61.0 ± 0.2    | 197.94 ± 0.65     | 202 ± 6       | 14.1 ± 0.5    | 14.4 ± 0.8  |
| Cr      | 2.3 ± 0.3                | 1.7 ± 0.9   | 0.3 - 0.5     | 0.31 ± 0.02   | 0.053 ± 0.014     | < 0.020       | -             | < 0.020     |
| Mn      | 58 ± 6                   | 59 ± 2      | 488 ± 12      | 476 ± 13      | 10.46 ± 0.47      | 9.97 ± 0.40   | 9.4 ± 0.9     | 9.2 ± 0.1   |
| Ni      | 1.7 ± 0.4                | 1.4 ± 0.1   | -             | 1.80 ± 0.10   | 0.0445 ± 0.0092   | < 0.023       | -             | < 0.023     |
| Co      | 0.39 ± 0.05              | 0.35 ± 0.08 | 0.061 ± 0.002 | < 0.023       | 0.300 ± 0.018     | 0.405 ± 0.140 | 0.006         | < 0.023     |
| Cu      | 5.2 ± 0.5                | 5.4 ± 0.4   | 2.8 ± 0.2     | 2.8 ± 0.2     | 275.2 ± 4.6       | 210.0 ± 7.5   | 2.1 ± 0.2     | 2.1 ± 0.1   |
| V       | 2.4 ± 0.3                | < 0.01      | -             | 0.130 ± 0.003 | 0.00817 ± 0.00066 | < 0.01        | 0.011         | < 0.01      |
| Mo      | 0.26 ± 0.04              | 0.28 ± 0.03 | -             | < 0.004       | 3.30 ± 0.13       | 2.80 ± 0.15   | 0.48 ± 0.03   | 0.41 ± 0.02 |
